# Supplementary material
Source: PubMed Central journal article supplement (PMC30243)
Supplement: pnas_041431898_2.pdf [file pnas_041431898_2.pdf]

**Table 2.** Difference in mean age at death for people born in a specific season from average age at death by major causes of death; Austria 1990-1997

| Causes of death<br>(ICDN)                  | Season of birth       |                       |                       |                       | <i>P</i> * | No. of<br>deaths |
|--------------------------------------------|-----------------------|-----------------------|-----------------------|-----------------------|------------|------------------|
|                                            | Winter<br>(Jan.–Mar.) | Spring<br>(Apr.–Jun.) | Summer<br>(Jul.–Sep.) | Autumn<br>(Oct.–Dec.) |            |                  |
| Heart disease<br>(390–429, 440–458)        | –0.08                 | <b>–0.30</b>          | 0.06                  | <b>0.33</b>           | 0.00       | 257,167          |
| CVD (430–438)                              | –0.01                 | <b>–0.23</b>          | –0.03                 | <b>0.27</b>           | 0.00       | 80,367           |
| Malignant neoplasms                        |                       |                       |                       |                       |            |                  |
| Breast (174)                               | 0.12                  | <b>–0.25</b>          | 0.00                  | <b>0.14</b>           | 0.53       | 12,201           |
| Uterus & female genito organs<br>(179–184) | 0.05                  | <b>–0.08</b>          | <b>0.10</b>           | –0.07                 | 0.92       | 9,530            |
| Prostate & male genito organs<br>(185–187) | <b>–0.18</b>          | –0.05                 | 0.01                  | <b>0.24</b>           | 0.40       | 9,401            |
| Urinary system<br>(188–189)                | –0.09                 | 0.07                  | <b>–0.39</b>          | <b>0.42</b>           | 0.06       | 8,508            |
| Haemoblastoses<br>(201–208)                | <b>–0.19</b>          | –0.07                 | –0.02                 | <b>0.28</b>           | 0.44       | 9,147            |
| Lung (162)                                 | –0.14                 | <b>–0.18</b>          | 0.06                  | <b>0.26</b>           | 0.06       | 24,178           |
| Stomach (151)                              | –0.10                 | <b>–0.44</b>          | 0.03                  | <b>0.50</b>           | 0.00       | 12,689           |
| Intestines (152–154)                       | –0.02                 | <b>–0.12</b>          | <b>0.12</b>           | 0.02                  | 0.70       | 21,233           |
| Other                                      | –0.07                 | <b>–0.24</b>          | –0.01                 | <b>0.33</b>           | 0.00       | 39,359           |
| Respiratory system<br>(460–479, 488–519)   | 0.04                  | <b>–0.18</b>          | –0.16                 | <b>0.33</b>           | 0.05       | 18,018           |
| Pneumonia and influenza<br>(480–487)       | –0.01                 | –0.10                 | <b>–0.35</b>          | <b>0.45</b>           | 0.02       | 10,807           |
| Digestive system<br>(520–579)              | 0.23                  | –0.20                 | <b>–0.28</b>          | <b>0.24</b>           | 0.01       | 27,384           |
| Diabetes mellitus (250)                    | –0.06                 | <b>–0.33</b>          | 0.19                  | <b>0.20</b>           | 0.06       | 13,537           |
| Other natural                              | <b>–0.26</b>          | –0.22                 | –0.08                 | <b>0.58</b>           | 0.00       | 27,197           |
| Violent (E800–E999)                        | –0.04                 | <b>–0.41</b>          | –0.01                 | <b>0.49</b>           | 0.00       | 21,998           |

Bold figures: maximum and minimum difference from average age at death . ICD, International classification of diseases; CVD, cerebrovascular disease.

\*, *P* value: ANOVA *F* test for all seasons.
